# Supplementary material for: Alu hypermethylation and high oxidative stress in patients with musculoskeletal tumors
Source: PeerJ. 2018 Aug 16;6:e5492. doi: 10.7717/peerj.5492 (PMC6098941; doi:10.7717/peerj.5492)
Supplement: Supplemental Information 1 — Values of Alu methylation and 8-OHdG levels in musculoskeletal tumor, adjacent tissue, blood leukocytes, and controls. [file peerj-06-5492-s001.xlsx]

## Sheet: Sheet1
Participants	Alu methylation levels	Controls	Plasma 8-OHdG	Adjacent tissues	8-OHdG tissues		Controls	Alu methylation levels
MS 1 (Normal)	52.7109	26.18	143.67	13.64	17.7		C1	58.6475
MS 1 (Tumor)	53.8229	34.02	55.62	3.89	6.52		C2	60.9007
MS 1 (Blood leukocytes)	55.3428	32.68	102.88	5.94	7.71		C3	60.2284
MS 2 (Normal)	50.1005	31.57	130.72	8.32	12.93		C4	53.2605
MS 2 (Tumor)	55.9065	34.04	87.73	6.56	3.31		C5	56.3088
MS 2 (Blood leukocytes)	60.4531	47.22	131.63	2.61	11.37		C6	64.8282
MS 3 (Normal)	51.2948	21.88	155.58	3.36	22.75		C7	57.8346
MS 3 (Tumor)	58.1328	36.38	104.46	4.93	4.97		C8	60.4532
MS 3 (Blood leukocytes)	62.2428	36.16	83.42	4.83	12.48		C9	59.9695
MS 4 (Normal)	37.9955	38.08	82.08	5.95	11.35		C10	67.9465
MS 4 (Tumor)	55.9323	40.41	152.01	4.87	13.9		C11	51.9367
MS 4 (Blood leukocytes)	60.2951	42.28	67.49	1.85	5.88		C12	68.6734
MS 5 (Normal)	55.2974	46.13	147.7	20.89	28.83		C13	46.0192
MS 5 (Tumor)	53.9739	27.29	134.14	4	50.79		C14	51.5146
MS 5 (Blood leukocytes)	62.7846	35.45	77.45	1.86	5.64		C15	59.3938
MS 6 (Normal)	57.6393	33.73	93.18	6.75	28.71		C16	62.1209
MS 6 (Tumor)	54.1814	36.17	64.16	2.76	19.2		C17	56.7642
MS 6 (Blood leukocytes)	65.9893	38.22	39.03	2.69	8.13		C18	64.3976
MS 7 (Normal)	65.5247	35.5	106.03	9.64	7.06		C19	60.2531
MS 7 (Tumor)	67.6086	40.88	149.8	1.15	5.99		C20	52.2597
MS 7 (Blood leukocytes)	71.922	27.03	45	3.79	9.92		C21	62.5705
MS 8 (Normal)	55.2974	34.7	122.71	6.96	8.32		C22	49.7692
MS 8 (Tumor)	53.9739	30.56	106.96	8.59	32.86		C23	39.3272
MS 8 (Blood leukocytes)	62.7846	42.19	75.56	6.17	4.63		C24	58.5844
MS 9 (Normal)	61.411	40.63	83.52	2.46	6.04		C25	55.9463
MS 9 (Tumor)	67.9104	27.65	83.75	2.88	7.3		C26	59.5668
MS 9 (Blood leukocytes)	78.0111	42.26	160.64	1.64	6.36		C27	52.197
MS 10 (Normal)	69.7178	50.21	105.07	1.16	7.38		C28	54.3166
MS 10 (Tumor)	74.2549	37.08	136.32	3.72	5.08		C29	55.0284
MS 10 (Blood leukocytes)	73.067	40.03	175.62	4.26	8.05		C30	52.1091
MS 11 (Normal)	56.0341	34.98	162.88	16.45	12.17		C31	51.9361
MS 11 (Tumor)	54.2183	36.64	88.67	7.85	11.28		C32	58.9783
MS 11 (Blood leukocytes)	64.3516	37.86	22.28	3.8	10.96		C33	53.3843
MS 12 (Normal)	82.6197	41.41	55.76	3.42	9.61		C34	51.0328
MS 12 (Tumor)	88.555	30.99	102.09	2.53	7.11		C35	52.5854
MS 12 (Blood leukocytes)	88.1603	19.47	72.74	2.08	8.75		C36	62.1095
MS 13 (Normal)	65.619	47.99	21.06	1.41	8.12		C37	55.3028
MS 13 (Tumor)	53.3869	38.2	110.94	3.71	62.28		C38	58.2126
MS 13 (Blood leukocytes)	52.4223	37.9	72.36	4.56	7.68		C39	49.3768
MS 14 (Normal)	75.6717	39.35	140.93	3.02	7.52		C40	51.0307
MS 14 (Tumor)	92.7851	30.62	88.21				C41	45.9867
MS 14 (Blood leukocytes)	94.3523	27.63	100.25				C42	37.1958
MS 15 (Normal)	96.2077	40.57	146.28				C43	40.1419
MS 15 (Tumor)	90.6637	10.37	71.86				C44	50.6037
MS 15 (Blood leukocytes)	91.5241	19.15	114.99				C45	46.087
MS 16 (Normal)	98.9961	36.89	110.28				C46	58.8071
Ms 16 (Tumor)	91.7947	37.63					C47	66.9464
MS 16 (Blood leukocytes)	93.516	37.73					C48	55.0702
MS 17 (Normal)	77.8686	35.49					C49	97.7501
MS 17 (Tumor)	77.1077	38.31					C50	61.7278
MS 17 (Blood leukocytes)	82.433	37.67					C51	46.7166
MS 18 (Normal)	93.5306	40.15					C52	46.3499
MS 18 (Tumor)	85.3866	42.64					C53	48.1932
MS 18 (Blood leukocytes)	85.8617	47.18					C54	47.7525
MS 19 (Normal)	84.0977	36.34					C55	57.878
MS 19 (Tumor)	85.279	35.09					C56	37.2252
MS 19 (Blood leukocytes)	95.4012	8.67					C57	38.9109
MS 20 (Normal)	89.4501	47.24					C58	43.2383
MS 20 (Tumor)	92.587	36.42					C59	37.0673
MS 20 (Blood leukocytes)	93.1416	41.02					C60	63.7539
MS 21 (Normal)	97.0706	49.48					C61	49.3156
MS 21 (Tumor)	94.3141	35.67					C62	56.3582
MS 21 (Blood leukocytes)	70.5421	34.58					C63	58.7384
MS 22 (Normal)	42.4505	41.31					C64	57.8135
MS 22 (Tumor)	57.7369	40.72					C65	61.0982
MS 22 (Blood leukocytes)	62.49	15.23					C66	56.8319
MS 23 (Normal)	97.8338	43.76					C67	61.2274
MS 23 (Tumor)	96.0449	41.09					C68	55.345
MS 23 (Blood leukocytes)	94.2054	120.65					C69	46.1129
MS 24 (Normal)	47.2584	61.97					C70	49.4843
MS 24 (Tumor)	51.1921	107.07					C71	48.4794
MS 24 (Blood leukocytes)	97.1999	56.78					C72	59.7424
MS 25 (Normal)	94.5932	137.64					C73	63.3543
MS 25 (Tumor)	96.4985	94.47					C74	56.7408
MS 25 (Blood leukocytes)	95.07	100.15					C75	64.8104
MS 26 (Normal)	70.2885	103.85					C76	55.4549
MS 26 (Tumor)	96.674	112.65					C77	54.3025
MS 26 (Blood leukocytes)	97.0572	142.69					C78	54.2317
MS 27 (Normal)	46.6028	116.72					C79	60.0359
MS 27 (Tumor)	52.643	131.24					C80	59.3054
MS 27 (Blood leukocytes)	94.0732	75.83					C81	58.4161
MS 28 (Normal)	70.5818	81.48					C82	61.8524
MS 28 (Tumor)	88.6251	86.24					C83	56.517
MS 28 (Blood leukocytes)	93.4317	109.68					C84	58.7653
MS 29 (Normal)	98.6109	127.18					C85	55.5308
MS 29 (Tumor)	97.6269	105.57					C86	56.4728
MS 29 (Blood leukocytes)	97.051	99.81					C87	60.4932
MS 30 (Normal)	54.5752	78.91					C88	53.8987
MS 30 (Tumor)	69.0006	97.08					C89	50.5995
MS 30 (Blood leukocytes)	78.962	74.6					C90	66.215
MS 31 (Normal)	54.7235	110.24					C91	65.6698
MS 31 (Tumor)	56.0554	100.55					C92	65.4508
MS 31 (Blood leukocytes)	41.1736	107.25					C93	65.3785
MS 32 (Normal)	55.7205	81.14					C94	58.9722
MS 32 (Tumor)	53.061	101.32					C95	55.5859
MS 32 (Blood leukocytes)	53.7052	125.43					C96	65.8742
MS 33 (Normal)	58.6143	111.92					C97	52.7891
MS 33 (Tumor)	60.9286	130.11					C98	53.7952
MS 33 (Blood leukocytes)	61.0707	130.41					C99	54.2591
MS 34 (Normal)	50.5232	87.8					C100	48.8197
MS 34 (Tumor)	53.3119	132.18					C101	55.0725
MS 34 (Blood leukocytes)	56.9927	137.15					C102	55.9277
MS 35 (Normal)	59.0796	130.91					C103	54.5241
MS 35 (Tumor)	54.5544	126.62					C104	55.3518
MS 35 (Blood leukocytes)	51.5017	91.57					C105	60.8303
MS 36 (Normal)	52.3312	91.2					C106	55.6922
MS 36 (Tumor)	45.5742	86.78					C107	61.0371
MS 36 (PBL)	49.8827
MS 37 (Normal)	94.6002
Ms 37 (Tumor)	99.369
MS 37 (Blood leukocytes)	78.962
MS 38 (Normal)	57.9233
MS 38 (Tumor)	58.7552
MS 38 (Blood leukocytes)	61.277
MS 39 (Normal)	58.0344
MS 39 (Tumor)	66.9799
MS 39 (Blood leukocytes)	67.1122
MS 40 (Normal)	52.0644
MS 40 (Tumor)	55.9632
MS 40 (Blood leukocytes)	66.4543
